# Supplementary material
Source: HighWire-hosted journal article supplement (https://ijgc.bmj.com/highwire/filestream/24854/field_highwire_adjunct_files/0/ijgc-2022-003614supp001_data_supplement.pdf)

**SUPPLEMENTARY MATERIAL****Supplementary Table 1. Terms for the electronic databases search.**

| <b>Search date</b>       | <b>Search string</b>                                                                                                                                                               |
|--------------------------|------------------------------------------------------------------------------------------------------------------------------------------------------------------------------------|
| 31 July 2021<br>- PubMed | ("PARP inhibitor" OR "PARP inhibitors" OR olaparib OR niraparib OR veliparib OR rucaparib OR cediranib) AND ("ovarian cancer" OR "ovarian carcinoma" OR ovar*)<br>Filters: English |

**Supplementary Table 2. PICOS structure for the study selection.**

|              |                                                                                                                    |
|--------------|--------------------------------------------------------------------------------------------------------------------|
| Population   | ≥65 years-old advanced ovarian cancer patients                                                                     |
| Intervention | PARP-inhibitors (monotherapy, plus chemotherapy or bevacizumab)                                                    |
| Control      | Non-PARP inhibitors (placebo alone, plus chemotherapy or bevacizumab)                                              |
| Outcome      | HR and 95% CI for progression-free survival, RR for adverse events with information on patients' age (<65 vs. ≥65) |
| Studies      | Randomized clinical trials                                                                                         |

CI: confidence interval; HR: hazard ratio; PARP: Poly(ADP-ribose) polymerase-1; RR: risk ratio

## Supplementary Figure 1. Risk of Bias (ROB-2) analysis of the included studies.

|                           | Random sequence generation (selection bias) | Allocation concealment (selection bias) | Blinding of participants and personnel (performance bias): All outcomes | Blinding of outcome assessment (detection bias): All outcomes | Incomplete outcome data (attrition bias): All outcomes | Selective reporting (reporting bias) | Other bias |
|---------------------------|---------------------------------------------|-----------------------------------------|-------------------------------------------------------------------------|---------------------------------------------------------------|--------------------------------------------------------|--------------------------------------|------------|
| ARIEL3                    | +                                           | +                                       | +                                                                       | +                                                             | +                                                      | +                                    |            |
| ENGOT-OV16/NOVA           | +                                           | +                                       | +                                                                       | +                                                             | +                                                      | +                                    |            |
| PAOLA-1                   | +                                           | +                                       | +                                                                       | +                                                             | +                                                      | +                                    |            |
| PRIMA/ENGOT-OV26/GOG-3012 | +                                           | +                                       | +                                                                       | +                                                             | +                                                      | +                                    |            |
| SOLO1                     | +                                           | +                                       | +                                                                       | +                                                             | +                                                      | +                                    |            |
| SOLO2/ENGOT-OV21          | +                                           | +                                       | +                                                                       | +                                                             | +                                                      | +                                    |            |
| VELIA/GOG-3005            | +                                           | +                                       | +                                                                       | +                                                             | +                                                      | +                                    |            |

### Supplementary Figure 2. Subgroup analysis: Forest plot of HRs in subgroup analysis stratified by type of therapy for progression-free survival in older and younger patients – Monotherapy

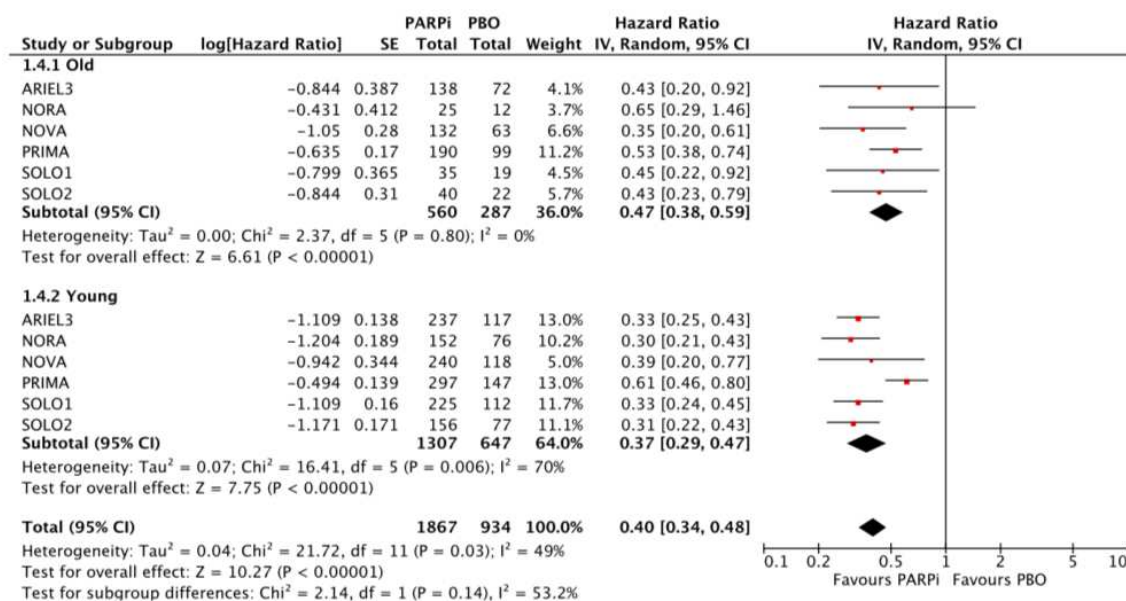

### Supplementary Figure 3. Subgroup analysis: Forest plot of HRs in subgroup analysis stratified by type of therapy for progression-free survival in older and younger patients – Combination

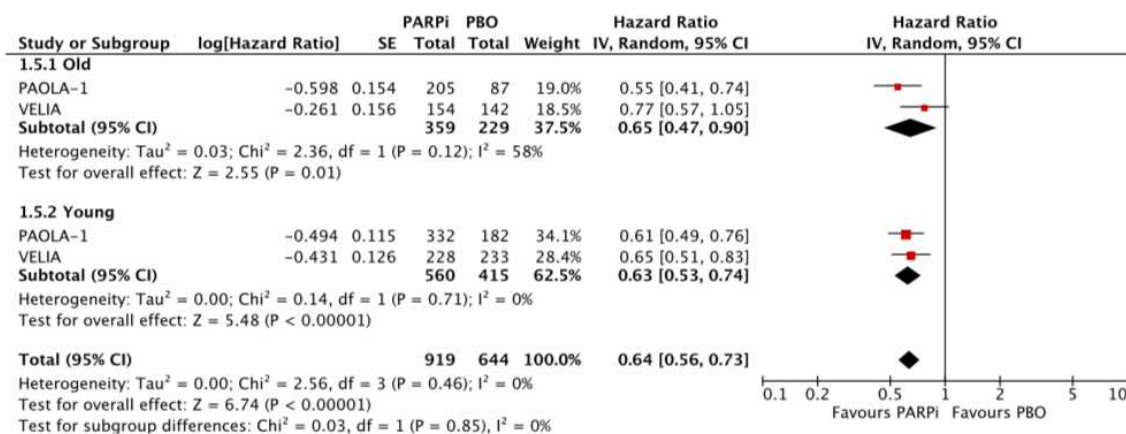

**Supplementary Figure 4. Subgroup analysis: Forest plot of HRs in subgroup analysis stratified by disease setting for progression-free survival in older vs. younger – Primary advanced ovarian cancer**

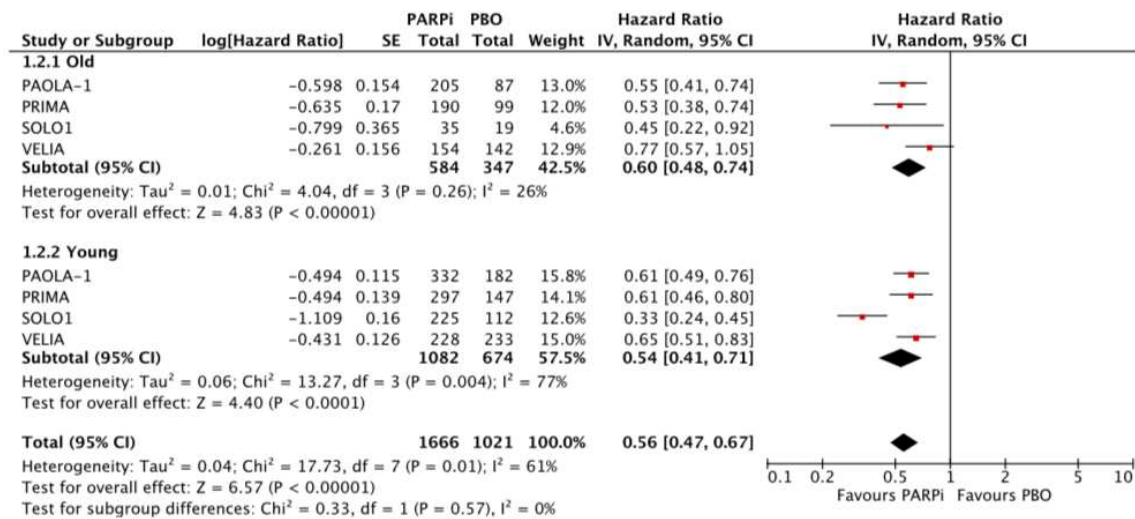

**Supplementary Figure 5. Subgroup analysis: Forest plot of HRs in subgroup analysis stratified by disease setting for progression-free survival in older vs. younger – platinum-sensitive recurrent ovarian cancer**

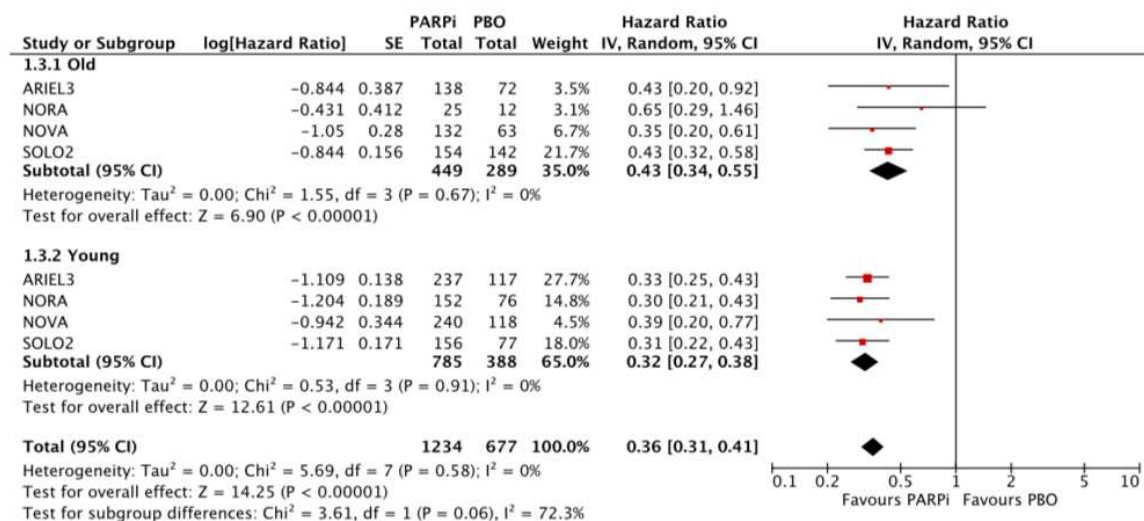

### Supplementary Figure 6. Sensitivity analysis for progression-free survival.

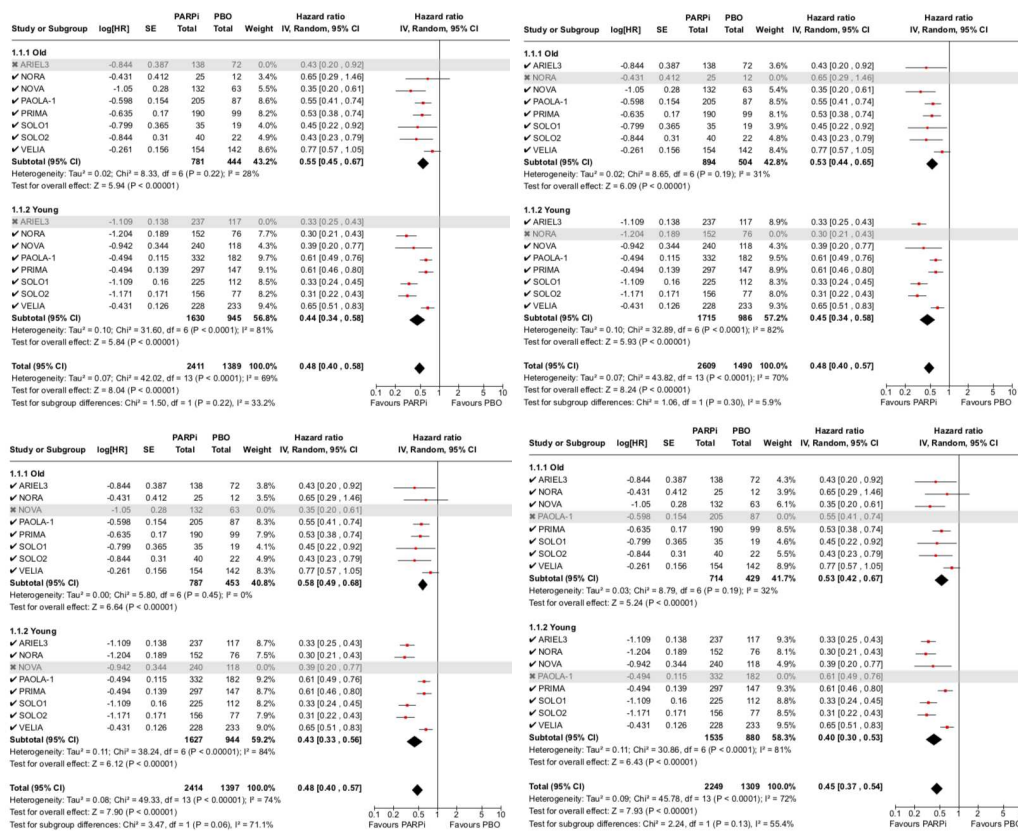



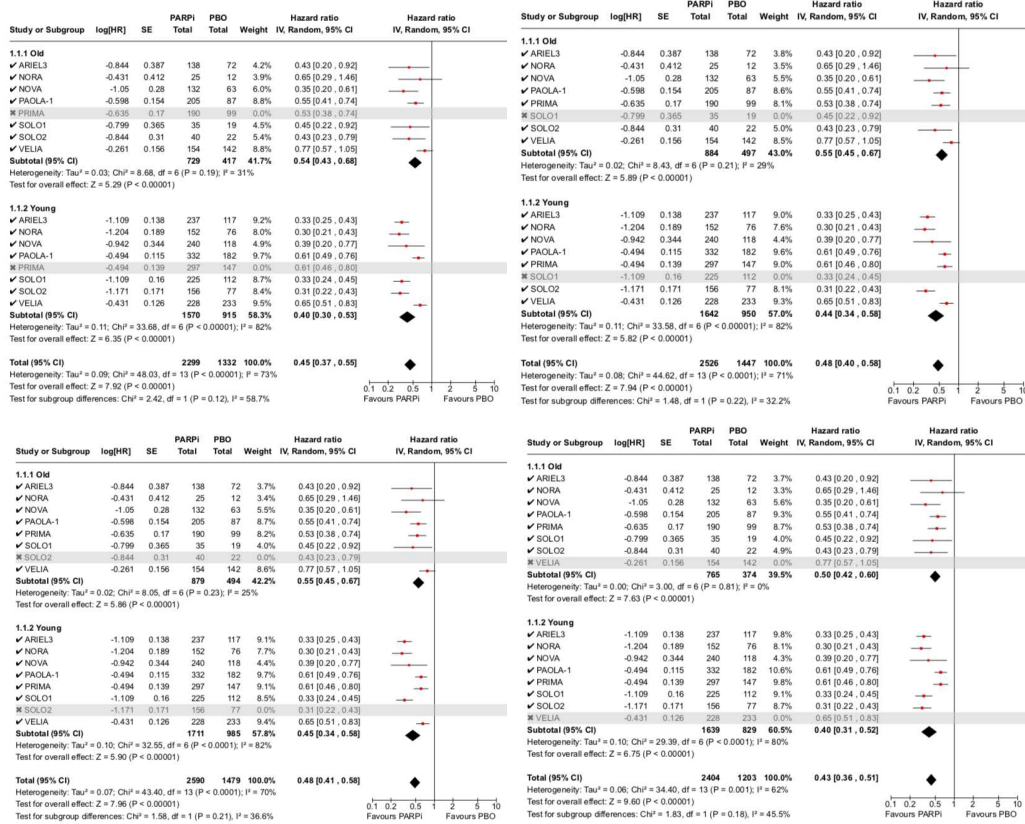

Supplement: ijgc-2022-003614supp001_data_supplement.pdf [file ijgc-2022-003614supp001_data_supplement.pdf]
